# Supplementary material for: Use of CO2 and nylon as the raw materials for flammable gas production through a catalytic thermo-chemical process
Source: Royal Society of Chemistry journal article supplement (doi:10.1039/d1gc02540f), 2021-01-01
Supplement: d1gc02540f1.pdf [file d1gc02540f1.pdf]

## **Supporting Information**

# **Use of CO<sub>2</sub> and Nylon as the Raw Materials for Flammable Gas Production through the Catalytic Thermo-Chemical Process**

Sangyoon Lee<sup>1,a</sup>, Sungyup Jung<sup>1,a</sup>, Kun-Yi Andrew Lin<sup>2</sup>, Yiu Fai Tsang<sup>3</sup>, and Eilhann E. Kwon<sup>1,\*</sup>

<sup>1</sup> *Department of Environment and Energy, Sejong University, Seoul 05006, Republic of Korea;*

<sup>2</sup> *Department of Environmental Engineering & Innovation and Development Center of Sustainable Agriculture & Research Center of Sustainable Energy and Nanotechnology, National Chung Hsing University, 250 Kuo-Kuang Road, Taichung, Taiwan;*

<sup>3</sup> *Department of Science and Environmental Studies, The Education University of Hong Kong, Tai Po, New Territories, 999077, Hong Kong;*

---

<sup>a</sup> *These authors are co-first authors because they equally contributed to this work*

<sup>\*</sup> *Corresponding author: Eilhann E. Kwon, Ph.D.; email: [ekwon74@sejong.ac.kr](mailto:ekwon74@sejong.ac.kr)*

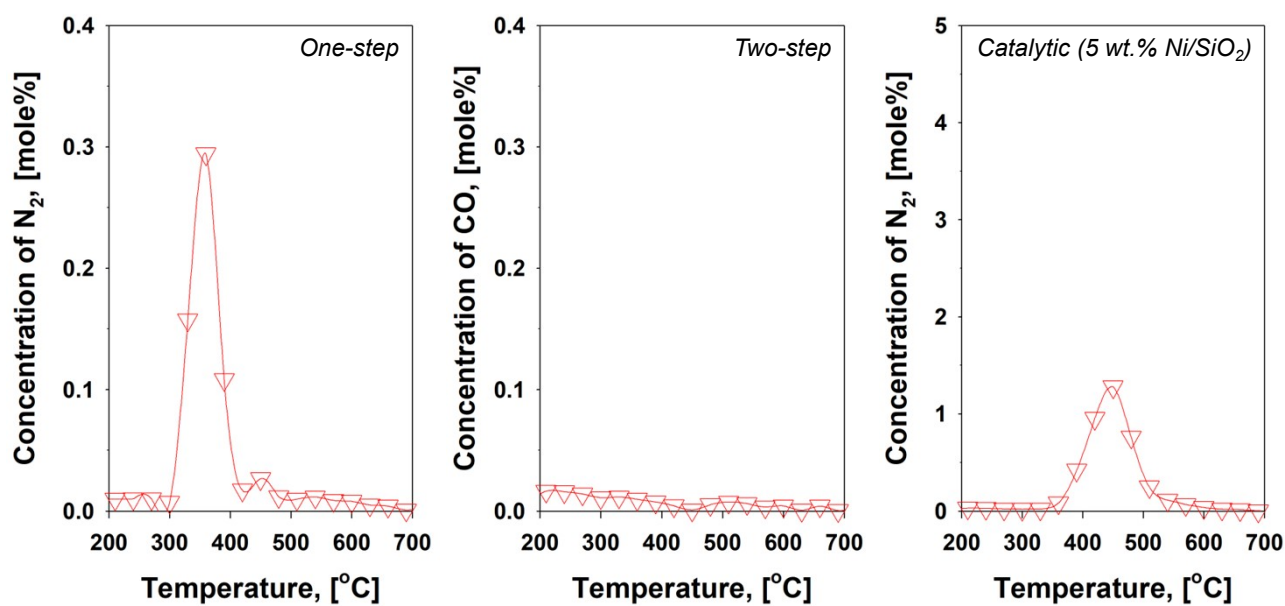

**Fig. S1.** Concentration of N<sub>2</sub> gas produced from one-step, two-step, catalytic pyrolysis of STW under CO<sub>2</sub> condition. X-axis represents the pyrolysis temperature of first heating block.
